# Supplementary material for: Comparison of Four Methods of RNA Extraction and cDNA Synthesis from The Venom of Peruvian Snakes of the Genus Bothrops of Clinical Importance
Source: MDPI journal article supplement (doi:10.3390/ijms241311161), 2023-07-06

## SUPPLEMENTARY INFORMATION

**Table S1.** List of primers used for amplification of six toxin-encoding transcripts

| Specificity                         | 5' → 3' Forward         | 5' → 3' Reverse         |
|-------------------------------------|-------------------------|-------------------------|
|                                     | primer sequence         | primer sequence         |
| SVSP                                | TCTTCTGAACTGGTCATTGG or | TTTCCTGCAATAATGCTCTG or |
|                                     | AGTCATTGGAGGTGATGAATG   | CGGGGGGCAAGTCTCAGTTGT   |
| PIII-SVMP                           | TCCAGCAAATCCAGCCTCC     | AGGTGTAGCCACATCAAC      |
| PI-SVMP                             | AGCTCTATAATCCTGGAATCTG  | ACAGTATCTGTTCTCAAGCG    |
| Asp49 PLA <sub>2</sub>              | TGGACCACGTTAAACTCTGCAG  | GGAGTCAGACCATGCTAA      |
| Lys49 PLA <sub>2</sub><br>homologue | AACCTGTGGCAATTGGGGAAG   | TTAGCATGGCTCTGCCTTCT    |
| Disintegrin                         | GAAGAATGTGACTGTGGC      | TCTGGGACAGTCAGCAG       |

## Uncropped gels

Relative to Figure 5

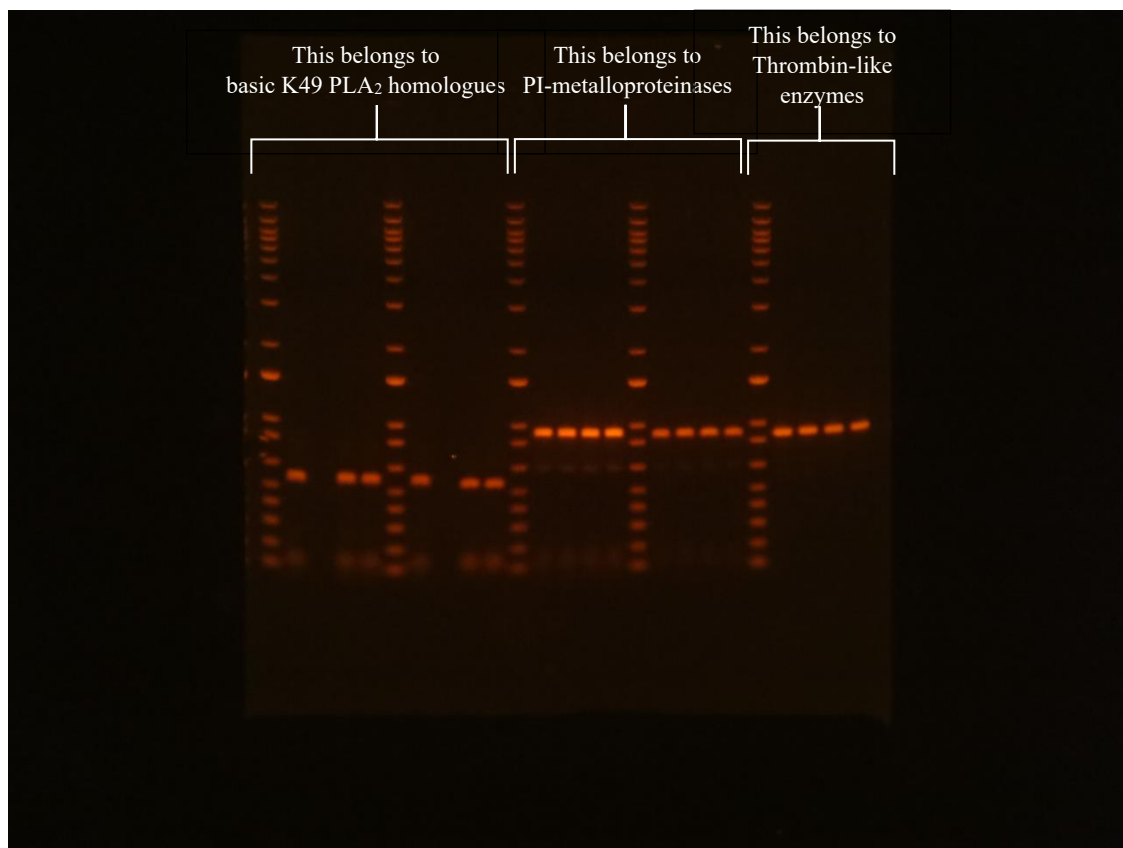

Relative to Figure 5

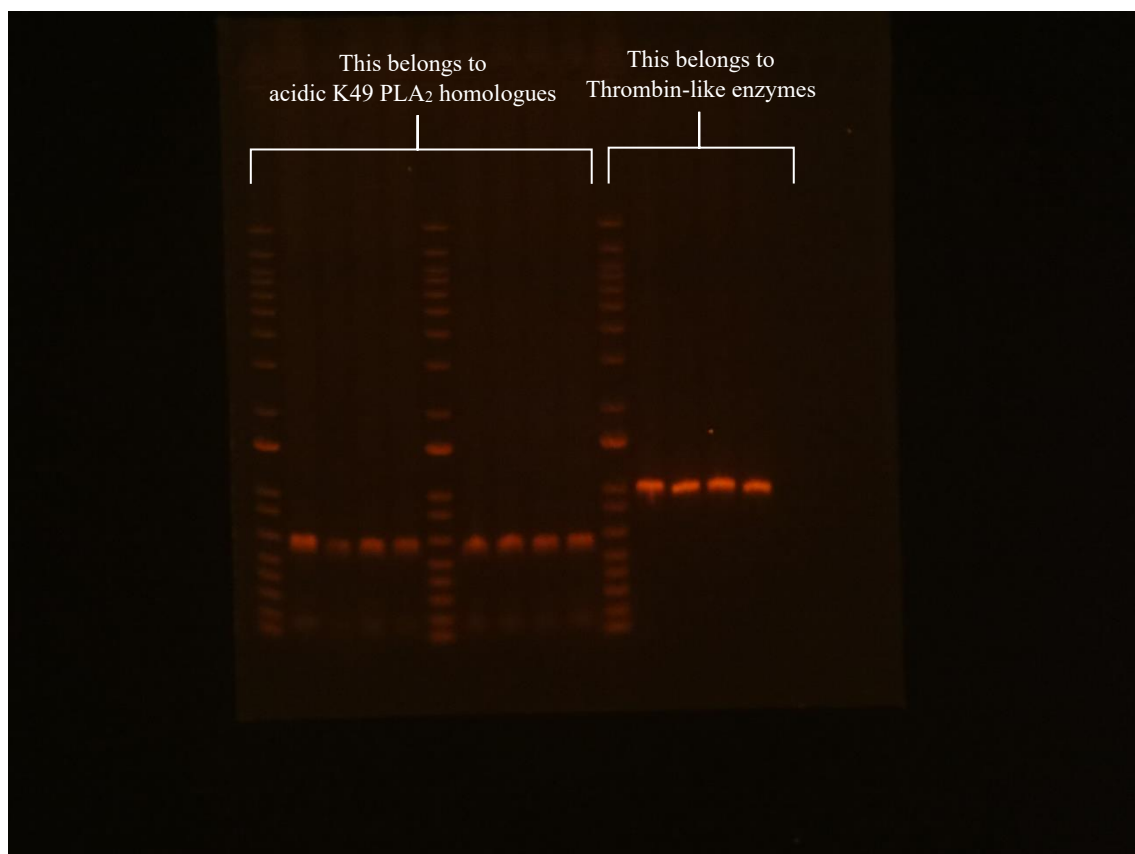

Relative to Figure 5

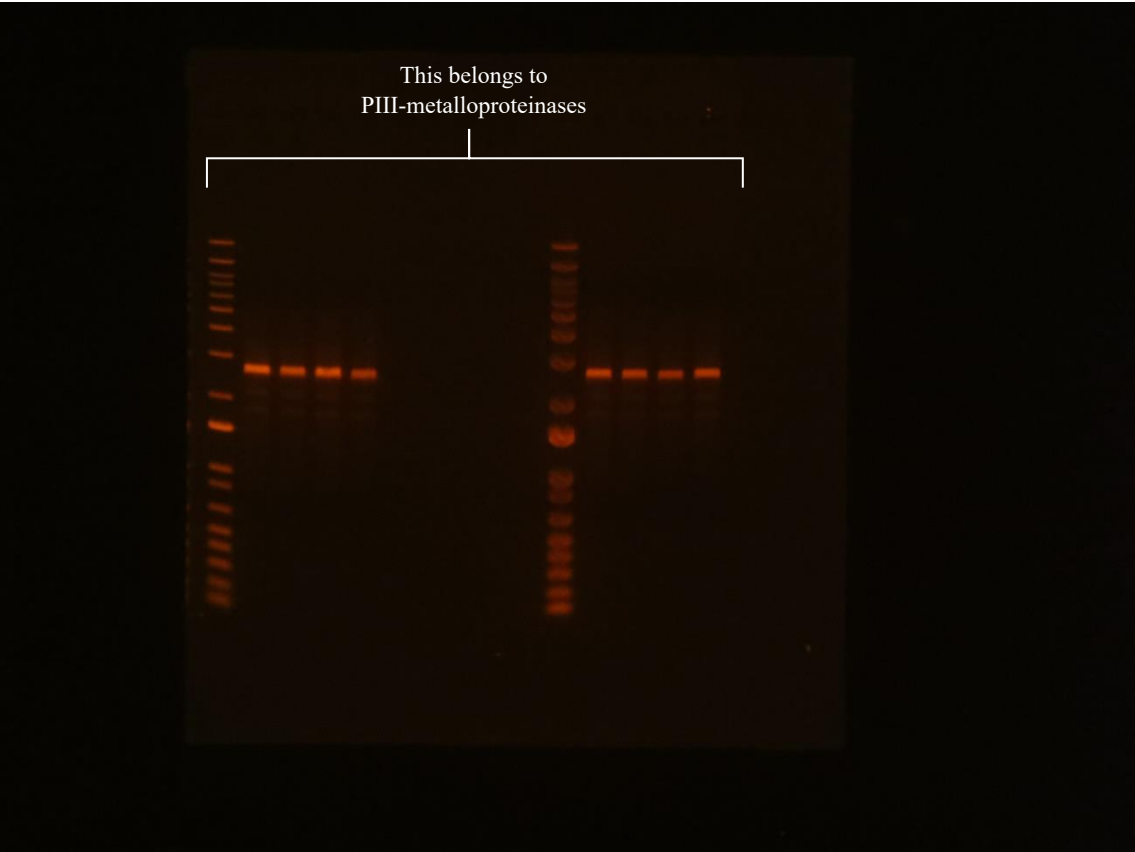

Relative to Figure 5

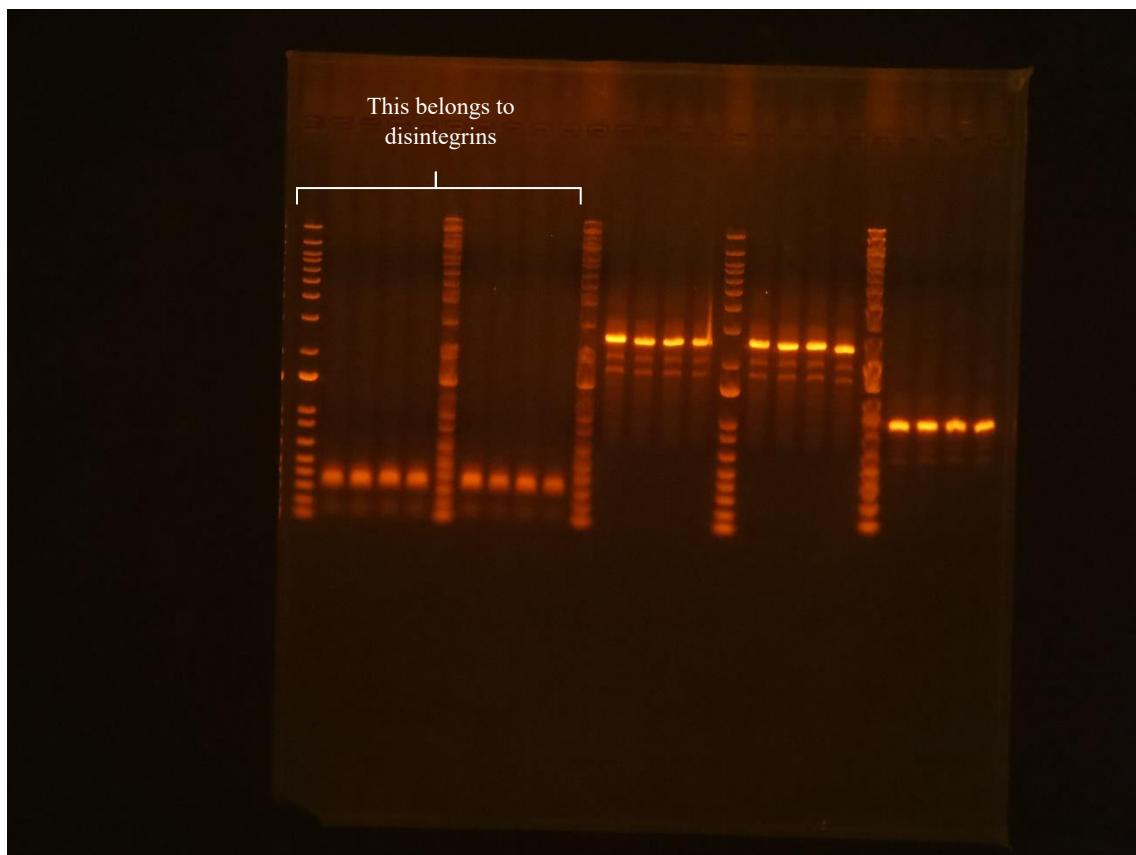

Relative to Figure 6

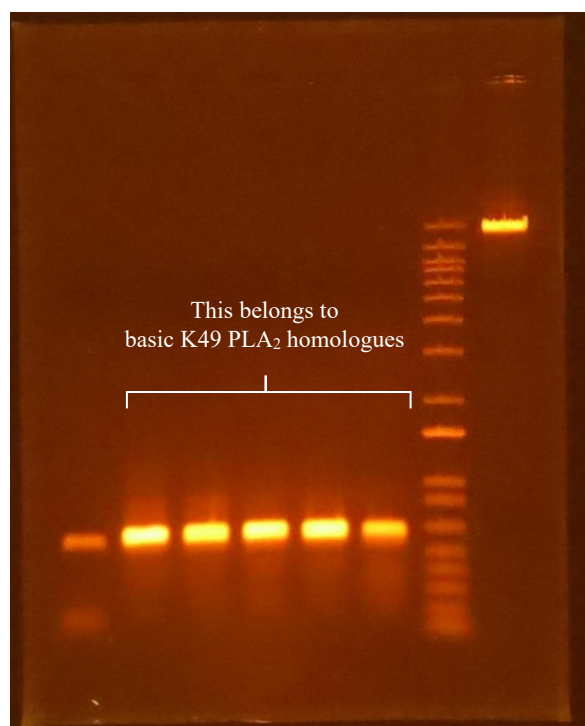

Relative to Figure 6

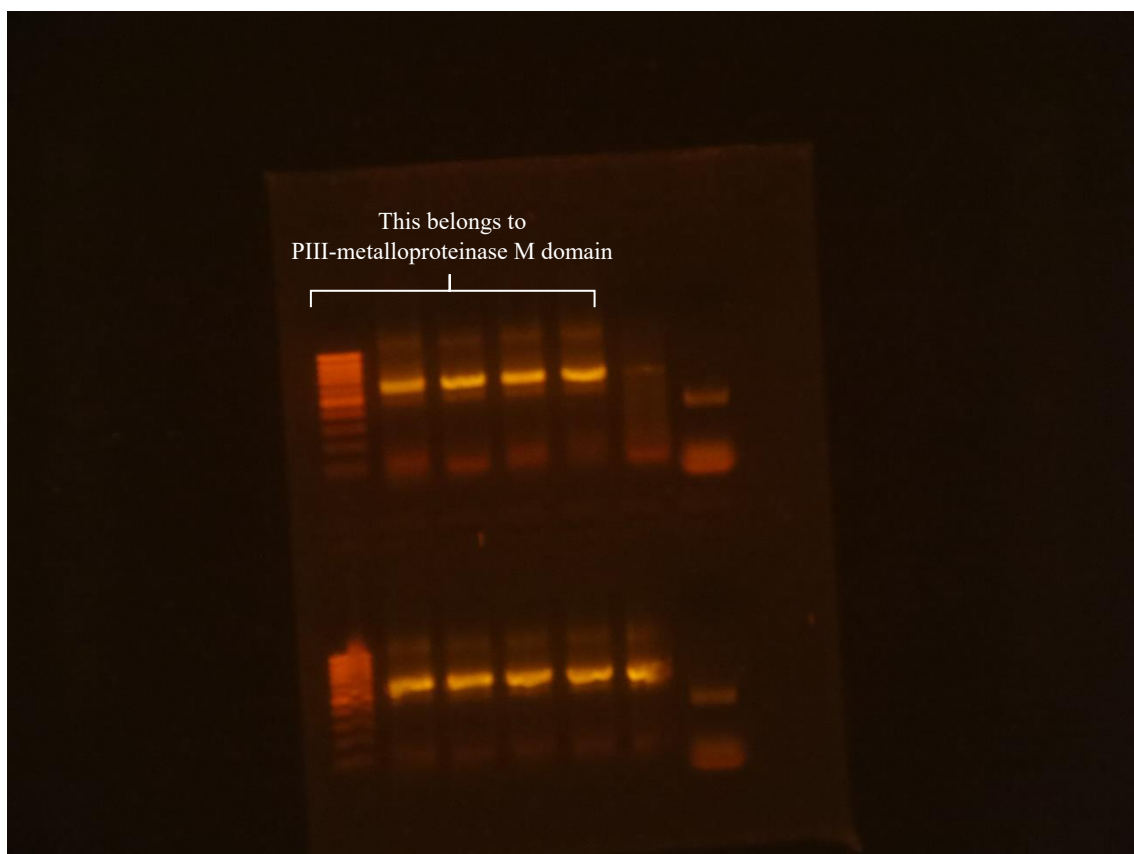

This belongs to  
acidic D49 phospholipases A2

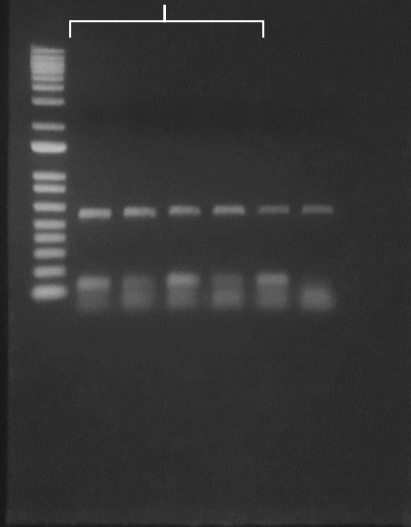

Supplement: s1 [file s1]
